# Supplementary material for: Calcium Intake and Lung Cancer Risk Among Female Nonsmokers: A Report from the Shanghai Women's Health Study
Source: Oxford University Press journal article supplement (doi:10.1158/1055-9965.epi-12-0915-t), 2012-11-15
Supplement: 10559965epi120915t-sup-epi-12-0915tab1.pdf [file 10559965epi120915t-sup-epi-12-0915tab1.pdf]

**Supplementary Table 1. Lung cancer risk associated with dietary calcium intake by passive smoking status<sup>1</sup>**

| Passive Smoking     |          | None        |           |            |  | At home or in the workplace |           |            |  | Both |           |            | <i>P</i> -interaction |
|---------------------|----------|-------------|-----------|------------|--|-----------------------------|-----------|------------|--|------|-----------|------------|-----------------------|
| Nutrient            | Quartile | Case        | HR        | 95% CI     |  | Case                        | HR        | 95% CI     |  | Case | HR        | 95% CI     |                       |
| Calcium<br>(mg/day) | 1        | 35          | Reference |            |  | 77                          | Reference |            |  | 24   | Reference |            |                       |
|                     | 2        | 32          | 0.98      | 0.60, 1.60 |  | 54                          | 0.85      | 0.60, 1.22 |  | 26   | 0.97      | 0.55, 1.71 |                       |
|                     | 3        | 22          | 0.60      | 0.34, 1.05 |  | 47                          | 0.81      | 0.55, 1.19 |  | 26   | 0.92      | 0.51, 1.66 |                       |
|                     | 4        | 22          | 0.51      | 0.27, 0.97 |  | 44                          | 0.80      | 0.52, 1.24 |  | 19   | 0.60      | 0.30, 1.21 |                       |
| P-trend             |          | <b>0.02</b> |           |            |  | 0.30                        |           |            |  | 0.15 |           |            | 0.87                  |

<sup>1</sup>Adjusted for age, total caloric intake, income, occupation, history of asthma, and BMI. The median value of each quartile was used to test for linear trend.
